# Supplementary material for: Effects of various morphologies on the optical and electrical properties of boehmite nanostructures
Source: Royal Society of Chemistry journal article supplement (doi:10.1039/c8ce01171k), 2018-01-01
Supplement: c8ce01171k1.pdf [file c8ce01171k1.pdf]

## **Effect of various morphologies on the optical and electrical properties of $\gamma$ - boehmite nanostructures**

Shubham Roy<sup>1</sup>, Anupam Maity<sup>1,2</sup>, Paulami Mandal<sup>1</sup>, Dipak Kr. Chanda<sup>3,4</sup>, Kunal Pal<sup>5</sup>, Souravi  
Bardhan<sup>1</sup>, Sukhen Das<sup>1\*</sup>

<sup>1</sup>Department of Physics, Jadavpur University, Kolkata-700032, India

<sup>2</sup>MLS Professor's Unit, Indian Association for the Cultivation of Science, Kolkata- 700032,  
India

<sup>3</sup>Advanced Materials and Mechanical Characterization, CSIR-Central Glass and Ceramics  
Research Institute, Kolkata- 700032, India

<sup>4</sup>School of Materials Science and Nano Technology, Jadavpur University, Kolkata-700032, India

<sup>5</sup>Department of Life Science and Biotechnology, Jadavpur University, Kolkata-700032, India

## **SUPPLEMENTARY DATA**

\*Corresponding Author: Sukhen Das

Address: Jadavpur University, Raja S.C.Mullick Road, Kolkata- 700032

Email id: sdasphysics@gmail.com

Contact No.: +91 9433091337

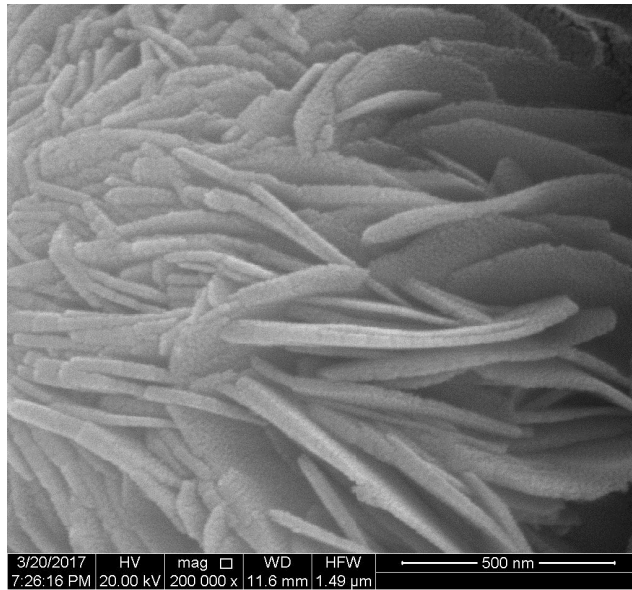

**Fig. SD1** High resolution FESEM image of UBH sample.

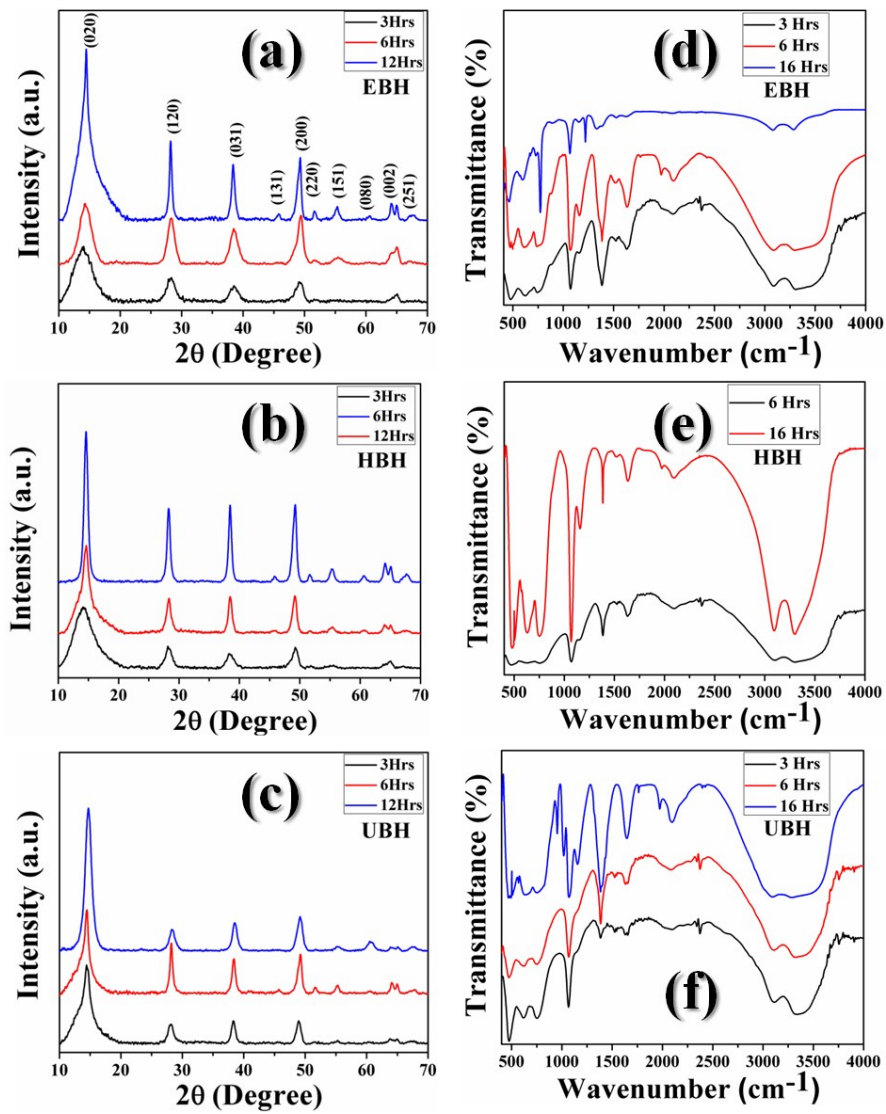

**Fig. SD2** X-Ray Diffractograms (a-c) and FT-IR spectra (d-f) of EBH, HBH and UBH samples after 3, 6 and 16 hrs of hydrothermal reaction.
